# Supplementary material for: Exploration of Users’ Perspectives and Needs and Design of a Type 1 Diabetes Management Mobile App: Mixed-Methods Study
Source: PubMed Central journal article supplement (PMC6231832; doi:10.2196/11400), 2018-09-21
Supplement: mhealth_v6i9e11400_app1.pdf [file mhealth_v6i9e11400_app1.pdf]

## Perspectives of diabetologists concerning diabetes app

Name            Gender            Age

Title: resident doctor attending doctor associate chief physician chief physician

Hospital name:

Hospital degree: upper first-class hospital middle first-class hospital second-class hospital  
second-class below

1. Have you ever down-loaded a diabetes app ?

( 1 ) No ( 2 ) Yes

2. Have you ever recommended diabetes apps to your patients ?

( 1 ) Yes ( 2 ) No

3. Which factors influence your recommendation of diabetes app to patients ? ( multi-choice )

( 1 ) Not having information about diabetes apps

( 2 ) The effectiveness of the apps was not evidence-based

( 3 ) APPs are too many, I don't know which is suitable

( 4 ) Apps are useless

( 5 ) Busyness ( 6 ) Others ( please specify ) \_\_\_\_\_

4. Have you ever used an app to manage patients with diabetes ? ( if no, please jump to question 7 )

( 1 ) Yes ( 2 ) No

5. Need patients pay for you when you manage their blood sugar ? ( 1 ) Yes ( 2 ) No

6. How many patients have you managed with diabetes app ?

(1) Less than 10 (2) 11-50 (3) 51-100 (4) More than 100

7. Do you think app is useful for blood sugar control?

(1) Useless (2) A little useful (3) Useful (4) Very useful

8. Which do you think is the biggest obstacle for your use of apps to manage diabetes patients ?  
( Single choice )

(1) How to charge (2) Limited time (3) Issue of legality (4) Patients' distrust (5) Others ( please specify ) \_\_\_\_\_

9. Do you think busyness influenced you to manage patients with app ?

(1) No (2) A little (3) Yes (4) Yes, very big

10. Do you think how to charge influenced you to manage patients with app ?

(1) No (2) A little (3) Yes (4) Yes, very big

11. Do you think it is legal to use an app to guide patients' medication ?

( 1 ) I don't know ( 2 ) legal ( 3 ) illegal

12. Do you think patients' distrust influenced you to manage patients with app ?

(1) No (2) A little (3) Yes (4) Yes, very big

13. Which do you think are the reasons for invalidity of diabetes apps ? ( multi-choice )

( 1 ) Patients can't stick to using them

( 2 ) Patients received little guidance from HCPs

( 3 ) Diabetes education knowledge on apps were unsystematic

( 4 ) App functions were incomplete

( 5 ) Others ( please specify ) \_\_\_\_\_

14. Which do you think is the most important functions of app ? ( single choice )  
 ( 1 ) Diabetes diary ( blood sugar, diet, exercise and medication records )  
 ( 2 ) Patient-doctor communication  
 ( 3 ) Diabetes education knowledge ( 4 ) Peer support  
 ( 5 ) Insulin dose calculator ( 6 ) Abnormal blood sugar reminder
15. Do you think feature of blood sugar record on app is important ?  
 ( 1 ) No ( 2 ) A little important ( 3 ) Important ( 4 ) Very important
16. Do you think feature of diet record on app is important ? ?  
 ( 1 ) No ( 2 ) A little important ( 3 ) Important ( 4 ) Very important
17. Do you think calculation of calories and carbohydrate on current apps are accurate?  
 ( 1 ) Completely inaccurate ( 2 ) A little inaccurate ( 3 ) Accurate ( 4 ) Very accurate
18. Do you think it is important for doctors to participate in app ?  
 ( 1 ) No ( 2 ) A little important ( 3 ) Important ( 4 ) Very important
19. Do you think it is important for diabetes nurse to participate in app ?  
 ( 1 ) No ( 2 ) A little important ( 3 ) Important ( 4 ) Very important
20. Do you think it is important for dietitian to participate in app ?  
 ( 1 ) No ( 2 ) A little important ( 3 ) Important ( 4 ) Very important
21. Do you think it is important for psychologist to participate in app ?  
 ( 1 ) No ( 2 ) A little important ( 3 ) Important ( 4 ) Very important
22. Do you think diabetes education knowledge on app is important ?  
 ( 1 ) No ( 2 ) A little important ( 3 ) Important ( 4 ) Very important
23. Do you think diabetes education knowledge on current diabetes apps are systematic ?  
 (1) All are not systematic (2) Only a few are systematic (3) Most are systematic (4) All are systematic (5) I don't know
24. Do you think peer support on app is important for patients ?  
 ( 1 ) No ( 2 ) A little important ( 3 ) Important ( 4 ) Very important
25. Do you recommend an insulin calculator on app?  
 (1)I'm opposed to it (2) I don't recommend it (3) I recommend it (4) I strongly recommend it
26. Do you think insulin calculators on apps are accurate?  
 (1) Completely inaccurate ( 2 ) A little inaccurate ( 3 ) accurate ( 4 ) very accurate ( 5 ) I don't know
27. Do you think insulin calculators on apps are dangerous for patients ?  
 ( 1 ) Not dangerous at all ( 2 ) A little dangerous ( 3 ) Dangerous ( 4 ) Very dangerous
28. Do you think abnormal blood sugar reminder on apps is important ?  
 (1) No (2) A little important (3) Important (4) Very important
29. Do you think type 1 diabetes and type 2 diabetes need different apps ?  
 (1) No (2) Yes
30. Which type of diabetes patients do you think need diabetes management app most?  
 ( 1 ) Type 1 diabetes ( 2 ) Type 2 diabetes ( 3 ) Gestational diabetes ( 4 ) Monogenic diabetic patients
31. Will you use an app to manage patients in the future ?  
 (1)No ( 2 ) Maybe ( 3 ) Of course
32. Will you recommend diabetes app to your patients in the future ?  
 (1)No ( 2 ) Maybe ( 3 ) Of course

33. How do you think of the prospects of the diabetes app ?  
( 1 ) Bad ( 2 ) Just so-so ( 3 ) Good ( 4 ) Very good
