# Supplementary material for: Exploration of Users’ Perspectives and Needs and Design of a Type 1 Diabetes Management Mobile App: Mixed-Methods Study
Source: PubMed Central journal article supplement (PMC6231832; doi:10.2196/11400), 2018-09-21
Supplement: mhealth_v6i9e11400_app2.pdf [file mhealth_v6i9e11400_app2.pdf]

## Perspectives and needs of diabetes patients concerning diabetes app

Name:            gender:  male  female age: \_\_\_\_\_years

Age of disease onset: \_\_\_\_\_years

Diabetes type:  type 1 diabetes  type 2 diabetes  gestational diabetes  I don't know

Treatment type :  oral hypoglycemic agents  insulin injection  insulin pump  lifestyle intervention

Residence: \_\_\_\_\_province\_\_\_\_\_city\_\_\_\_\_county  urban  rural

Education :  Primary school or below  middle school  high school  university  postgraduate

Occupation:  student a civil servant or staff member  staff and workers of state owned enterprises  employees of foreign enterprises / private / joint ventures  private business owners or individual business households retired farmer  unemployed others ( please specify ) \_\_\_\_\_

### Parents' education

**Father**primary school or below  middle school  high school  university  postgraduate

**Mother** primary school or below  middle school  high school  university  postgraduate

### Parents' occupation:

**Father**  a civil servant or staff member  staff and workers of state owned enterprises  employees of foreign enterprises / private / joint ventures  private business owners or individual business households retired Farmer  unemployed others ( specify ) \_\_\_\_\_

**Mother**  a civil servant or staff member  staff and workers of state owned enterprises  employees of foreign enterprises / private / joint ventures  private business owners or individual business households retired farmer  unemployed others ( please specify ) \_\_\_\_\_

**Marriage:**  unmarried married divorced

**Annual income of family**less than 50000 yuan50001-100000yuan 100001-150000 yuan more than 150000 yuan

1.Do you know diabetes apps ? ( if no, jump to question 25 )

( 1 ) no ( 2 ) yes

2. Have you ever used a diabetes app? ( if no, jump to question 25 )

( 1 ) no ( 2 ) yes

3.Who recommended your diabetes app ?

( 1 ) health care professionals ( 2 ) diabetes friend ( 3 ) media ( 4 ) I selected randomly because I did not know which one was best ( 5 ) others ( please specify ) \_\_\_\_\_

4. How frequent do you use diabetes app?

( 1 ) everyday ( 2 ) 3-6 days a week ( 3 ) 1-2 days a week ( 4 ) less than one time a week ( 5 ) less than one time a month ( 6 ) I hardly use it

5. Why you don't want to use your diabetes app ? **( multi-choice )**  
( 1 ) complicated operations ( 2 ) useless ( 3 ) lack of time ( 4 ) cost ( 5 ) others ( please specify ) \_\_\_\_\_
6. Do you think diabetes app is helpful for you?  
( 1 ) useless ( 2 ) a little helpful ( 3 ) helpful ( 4 ) very helpful
7. Does your app has a function of blood sugar record ? **( if no, jump to question 10 )**  
( 1 ) no ( 2 ) yes
8. Do you think manual input of blood sugar in your app is burdensome? ?  
( 1 ) no ( 2 ) a little burdensome ( 3 ) burdensome ( 4 ) very burdensome
9. How frequent do you use diabetes app to record blood sugar?  
( 1 ) everyday ( 2 ) 3-6 days a week ( 3 ) 1-2 days a week ( 4 ) less than one time a week  
( 5 ) less than one time a month ( 6 ) I hardly use it to record blood sugar
10. Does your app have a function of recording diet ? **( if no, jump to question 12 )**  
( 1 ) no ( 2 ) yes
11. How frequent do you use diabetes app to record diet?  
( 1 ) everyday ( 2 ) 3-6 days a week ( 3 ) 1-2 days a week ( 4 ) less than one time a week  
( 5 ) less than one time a month ( 6 ) I hardly use it to record
12. Does your app have a function of recording exercise ? **( if no, jump to question 14 )**  
( 1 ) no ( 2 ) yes
13. How frequent do you use diabetes app to record exercise?  
( 1 ) everyday ( 2 ) 3-6 days a week ( 3 ) 1-2 days a week ( 4 ) less than one time a week  
( 5 ) less than one time a month ( 6 ) I hardly use it to record
14. Does your app have a function of consulting health care professionals ? **( if no, jump to question 19 )**  
( 1 ) no ( 2 ) yes
15. Have you ever consulted health care professionals using diabetes app ? **( if no, jump to question 19 )**  
( 1 ) no ( 2 ) yes
16. Do you have to pay if you consult health care professionals using your app ?  
( 1 ) no ( 2 ) yes
17. Do you think consulting health care professionals on app is helpful for you ?  
(1) Not helpful at all ( 2 ) a little helpful ( 3 ) helpful ( 4 ) very helpful
18. Why do you think consulting the health care professionals on app is helpless for you ?  
( 1 ) Responses are not in time ( 2 ) They lack expertise ( 3 ) Communication time is too short ( 4 ) Others ( please specify ) \_\_\_\_\_
19. Does your app have diabetes education knowledge ? **( if no, jump to question 21 )**  
( 1 ) no ( 2 ) yes
20. Do you think diabetes education knowledge on your app is helpful for you ?  
(1) not helpful at all ( 2 ) a little helpful ( 3 ) helpful ( 4 ) very helpful
21. Does your app have an insulin dose calculator ? **( if no, jump to question 23 )**  
( 1 ) no ( 2 ) yes
22. Do you think insulin dose calculator on your app is accurate ?  
( 1 ) inaccurate ( 2 ) accurate ( 3 ) I don't know
23. Does your app have the function of abnormal blood sugar reminder ?

( 1 ) no ( 2 ) yes

**24** Does your app have the function of blood sugar test reminder ?

( 1 ) no ( 2 ) yes

**25.**Which function do you think is most important for you if we design a diabetes app ? ( Single choice )

( 1 ) diabetes diary ( blood sugar, diet, exercise and medication record )

( 2 ) consulting HCPs

( 3 ) diabetes education knowledge

( 4 ) peer support

( 5 ) insulin dose calculator

( 6 ) abnormal blood sugar reminder

( 7 ) blood sugar test reminder

( 8 ) others ( please specify ) \_\_\_\_\_

**26.**Do you think diabetes diary ( blood sugar, diet, exercise and medication records ) on diabetes app is important for you ?

(1) not important at all ( 2 ) a little important ( 3 ) important ( 4 ) very important

**27.** Do you think the function of consulting HCPs on diabetes app is important for you ?

(1) not important at all ( 2 ) a little important ( 3 ) important ( 4 ) very important

**28.** Do you think diabetes education knowledge on diabetes app is important for you ?

(1) not important at all ( 2 ) a little important ( 3 ) important ( 4 ) very important

**29.** Do you think the function of peer support on diabetes app is important for you ?

(1) not important at all ( 2 ) a little important ( 3 ) important ( 4 ) very important

**30.** Do you think the function of insulin dose calculator on diabetes app is important for you ?

(1) not important at all ( 2 ) a little important ( 3 ) important ( 4 ) very important

**31.** Do you think the function of blood sugar test reminder on diabetes app is important for you ?

(1) not important at all ( 2 ) a little important ( 3 ) important ( 4 ) very important

**32.** Do you think the function of abnormal blood sugar reminder on diabetes app is important for you ?

(1) not important at all ( 2 ) a little important ( 3 ) important ( 4 ) very important

**33.** Do you think you have to pay if you consult medical staffs using apps ?

( 1 ) no ( 2 ) yes

**34.**If you have to pay for your diabetes app, will you continue to use it ?

( 1 ) no ( 2 ) If effect is good, I will ( 3 ) yes, certainly

**35.**Do you want to have a good diabetes app to help you to manage your blood sugar ?

( 1 ) no ( 2 ) yes, I need ( 3 ) yes, I'm in great need of it
