# Supplementary material for: Exploration of Users’ Perspectives and Needs and Design of a Type 1 Diabetes Management Mobile App: Mixed-Methods Study
Source: PubMed Central journal article supplement (PMC6231832; doi:10.2196/11400), 2018-09-21
Supplement: mhealth_v6i9e11400_app3.pdf [file mhealth_v6i9e11400_app3.pdf]

- 1 Have you ever received diabetes education program in hospital ? why ?
- 2 which do you prefer, studying on diabetes app or receiving diabetes education program in hospital? Why?
- 3 How do you control your blood sugar in your daily life? (including self-monitoring blood sugar, diet management, exercise management, insulin management )
- 4 What functions does your APP have? What are the problems of these functions? Do you have any suggestions?
- 5 What suggestions and needs do you have if we design a diabetes app?
