# Supplementary material for: Exploration of Users’ Perspectives and Needs and Design of a Type 1 Diabetes Management Mobile App: Mixed-Methods Study
Source: PubMed Central journal article supplement (PMC6231832; doi:10.2196/11400), 2018-09-21
Supplement: mhealth_v6i9e11400_app4.pdf [file mhealth_v6i9e11400_app4.pdf]

**Multimedia Appendix 4: app functions and design**

| <b>App modules</b>           | <b>Problems of current apps and patients' needs for a new app</b> | <b>app functions</b>                                                                                                                           | <b>suggestions</b>                                                            |
|------------------------------|-------------------------------------------------------------------|------------------------------------------------------------------------------------------------------------------------------------------------|-------------------------------------------------------------------------------|
| patient-doctor communication | Distrust                                                          |                                                                                                                                                | Advocate doctors to follow up with their outpatients or inpatients            |
|                              |                                                                   | Eligibility assessment: registered doctors are from tertiary hospitals with years of experience in T1DM management                             |                                                                               |
|                              | Responses are not timely                                          | Notifications are automatically sent to the patients or their doctors if there are new messages for them                                       |                                                                               |
|                              | inconvenient                                                      | Various types of communication modes: typing words, sending pictures, video chat and phone calls                                               |                                                                               |
|                              | Cost                                                              |                                                                                                                                                | Coverage of health insurance is needed<br>Government subsidy policy is needed |
| Diabetes diary               | Manual input of data is burdensome                                | Blood sugar results can automatically be transferred from glucose meter to our app by Bluetooth or GPRS                                        |                                                                               |
|                              |                                                                   | Patients can take photos of foods using the built-in camera if they have no time for detailed diet records                                     |                                                                               |
|                              |                                                                   | Daily step counts can be recorded automatically by obtaining step count data from step counter software in mobile phones                       |                                                                               |
|                              | Food data-base is needed                                          | Introduce calories and nutrients of foods<br>Calculates recommended intake of calories, carbohydrates, fat and protein automatically according |                                                                               |

|                              |                                            |                                                                                                                                                                    |  |
|------------------------------|--------------------------------------------|--------------------------------------------------------------------------------------------------------------------------------------------------------------------|--|
|                              |                                            | to patient's height, weight, and activity level                                                                                                                    |  |
|                              | Lack of feed-back                          | Doctors view their patients' diabetes diaries and give tailored feedback                                                                                           |  |
|                              |                                            | Set blood sugar targets. Off-target blood sugar alert. If blood sugar is dangerous, a reminder message will be sent automatically to patient and his doctor's app. |  |
|                              | Display is not as intuitive as paper diary | Blood sugar History graphs and statistics make blood sugars be clear at a glance                                                                                   |  |
|                              |                                            | Diet, exercise, and medication can all be seen in the blood sugar display page, allowing a comprehensive analysis of the causes of blood sugar changes             |  |
|                              | Forget to test blood sugar                 | Blood sugar test reminder<br><br>Set a family member account to supervise the patients                                                                             |  |
|                              | Decline in disease alertness               |                                                                                                                                                                    |  |
| Diabetes education knowledge | Unsystematic; Unprofessional               | Systematic T1DM education materials in our app are made by a multidisciplinary specialists panel                                                                   |  |
|                              | Avoid irrelevant knowledge interference    | Education materials are specific for T1DM patients                                                                                                                 |  |
|                              |                                            | Education materials are classified according to different categories, so that patients can select materials that they are interested in to learn.                  |  |
|                              | Want to find interested materials easily   | Search and navigation functions                                                                                                                                    |  |
|                              | Want Knowledge to be update in time        | Renew latest progress in diabetes periodically                                                                                                                     |  |
|                              |                                            | Set quizzes to test patients' diabetes knowledge level                                                                                                             |  |

|                           |                                          |                                                                                                                                                                                                                    |                                                                    |
|---------------------------|------------------------------------------|--------------------------------------------------------------------------------------------------------------------------------------------------------------------------------------------------------------------|--------------------------------------------------------------------|
|                           | Interaction is needed                    | Record the length of their study time about each diabetes education materials. Their doctors can see it and send tailored education materials to them                                                              |                                                                    |
|                           | Tend to learn pop-up knowledge           | New knowledge uses pop-up design                                                                                                                                                                                   |                                                                    |
|                           | Different learning habits                | Different modes of educational materials: videos, articles, PPT, short message and so on                                                                                                                           |                                                                    |
| Peer-support              | Exchange mode is inconvenient            | Different modes of peer support: forums and group-chats                                                                                                                                                            |                                                                    |
|                           |                                          | Add friends to chat privately                                                                                                                                                                                      |                                                                    |
|                           |                                          | Notifications are automatically sent to patients if there are new messages for them                                                                                                                                |                                                                    |
|                           | Avoid excessive information interference | Different categories of peer communities for patients to join in selectively                                                                                                                                       |                                                                    |
|                           | Peer leader is needed                    | Invite several experienced T1DM patients to each peer community as peer leaders                                                                                                                                    |                                                                    |
|                           | Privacy protection                       | Use nickname in the peer-support module                                                                                                                                                                            |                                                                    |
| Psychological module      | Pay attention to patients' mental health | Scales such as self-evaluation of depression and anxiety are included in the app. If a score is abnormal, a message is sent automatically to the patient and his doctor to remind him to seek medical interference | Psychologists are needed to offer on-line psychological counseling |
| Electronic health records | Access to hospital EMR                   | Connect to hospital EMR to view their laboratory results, records of diagnosis and treatments                                                                                                                      |                                                                    |
